# Supplementary material for: Decreasing the Impact of Anxiety on Cancer Prevention through Online Intervention
Source: MDPI journal article supplement (doi:10.3390/ijerph17030985), 2020-02-05
Supplement: s1 [file s1]

**Table S1.** Differences in level of anxiety associated with selected diseases: baseline and final assessment in intervention and control groups.

| Disease                                    | Level | Intervention |             | <i>p</i> <sup>**</sup> | Control     |             | <i>p</i> <sup>**</sup> |
|--------------------------------------------|-------|--------------|-------------|------------------------|-------------|-------------|------------------------|
|                                            |       | Baseline     | Final       |                        | Baseline    | Final       |                        |
| Myocardial infarction                      | 1     | 26 (12.6%)   | 21 (10.1%)  | 0.3                    | 30 (11.7%)  | 27 (10.5%)  | 0.2                    |
|                                            | 2     | 27 (13.0%)   | 33 (15.9%)  |                        | 38 (14.8%)  | 48 (18.8%)  |                        |
|                                            | 3     | 46 (22.2%)   | 56 (27.1%)  |                        | 76 (29.7%)  | 78 (30.5%)  |                        |
|                                            | 4     | 55 (26.6%)   | 55 (26.6%)  |                        | 61 (23.8%)  | 61 (23.8%)  |                        |
|                                            | 5     | 53 (25.6%)   | 42 (20.3%)  |                        | 51 (19.9%)  | 42 (16.4%)  |                        |
| Brain stroke                               | 1     | 14 (6.8%)    | 13 (6.3%)   | 0.3                    | 17 (6.6%)   | 15 (5.9%)   | 0.1                    |
|                                            | 2     | 25 (12.1%)   | 21 (10.1%)  |                        | 20 (7.8%)   | 25 (9.8%)   |                        |
|                                            | 3     | 27 (13.0%)   | 43 (20.8%)  |                        | 47 (18.4%)  | 52 (20.3%)  |                        |
|                                            | 4     | 50 (24.2%)   | 51 (24.6%)  |                        | 64 (25.0%)  | 76 (29.7%)  |                        |
|                                            | 5     | 91 (44.0%)   | 79 (38.2%)  |                        | 108 (42.2%) | 88 (34.4%)  |                        |
| Diabetes                                   | 1     | 48 (23.2%)   | 39 (18.8%)  | 0.5                    | 60 (23.4%)  | 50 (19.5%)  | 0.4                    |
|                                            | 2     | 63 (30.4%)   | 67 (32.4%)  |                        | 63 (24.6%)  | 78 (30.5%)  |                        |
|                                            | 3     | 62 (30.0%)   | 69 (33.3%)  |                        | 74 (28.9%)  | 84 (32.8%)  |                        |
|                                            | 4     | 25 (12.1%)   | 23 (11.1%)  |                        | 39 (15.2%)  | 29 (11.3%)  |                        |
|                                            | 5     | 9 (4.3%)     | 9 (4.3%)    |                        | 20 (7.8%)   | 15 (5.9%)   |                        |
| Cancer                                     | 1     | 15 (7.2%)    | 11 (5.3%)   | 0.03                   | 9 (3.5%)    | 10 (3.9%)   | 0.6                    |
|                                            | 2     | 12 (5.8%)    | 16 (7.7%)   |                        | 9 (3.5%)    | 11 (4.3%)   |                        |
|                                            | 3     | 23 (11.1%)   | 34 (16.4%)  |                        | 34 (13.3%)  | 26 (10.2%)  |                        |
|                                            | 4     | 41 (19.8%)   | 48 (23.2%)  |                        | 53 (20.7%)  | 67 (26.2%)  |                        |
|                                            | 5     | 116 (56.0%)  | 98 (47.3%)  |                        | 151 (59.0%) | 142 (55.5%) |                        |
| Asthma                                     | 1     | 71 (34.3%)   | 65 (31.4%)  | 0.3                    | 74 (28.9%)  | 67 (26.2%)  | 0.9                    |
|                                            | 2     | 53 (25.6%)   | 68 (32.9%)  |                        | 78 (30.5%)  | 88 (34.4%)  |                        |
|                                            | 3     | 52 (25.1%)   | 50 (24.2%)  |                        | 67 (26.2%)  | 69 (27.0%)  |                        |
|                                            | 4     | 20 (9.7%)    | 15 (7.2%)   |                        | 29 (11.3%)  | 26 (10.2%)  |                        |
|                                            | 5     | 11 (5.3%)    | 9 (4.3%)    |                        | 8 (3.1%)    | 6 (2.3%)    |                        |
| Flu                                        | 1     | 98 (47.3%)   | 105 (50.7%) | 0.05                   | 142 (55.5%) | 133 (52.0%) | 0.6                    |
|                                            | 2     | 54 (26.1%)   | 61 (29.5%)  |                        | 79 (30.9%)  | 92 (35.9%)  |                        |
|                                            | 3     | 40 (19.3%)   | 29 (14.0%)  |                        | 28 (10.9%)  | 23 (9.0%)   |                        |
|                                            | 4     | 6 (2.9%)     | 10 (4.8%)   |                        | 6 (2.3%)    | 6 (2.3%)    |                        |
|                                            | 5     | 9 (4.3%)     | 2 (1.0%)    |                        | 1 (0.4%)    | 2 (0.8%)    |                        |
| Liver cirrhosis                            | 1     | 40 (19.3%)   | 35 (16.9%)  | 0.1                    | 50 (19.5%)  | 49 (19.1%)  | 0.2                    |
|                                            | 2     | 32 (15.5%)   | 40 (19.3%)  |                        | 43 (16.8%)  | 50 (19.5%)  |                        |
|                                            | 3     | 46 (22.2%)   | 56 (27.1%)  |                        | 65 (25.4%)  | 69 (27.0%)  |                        |
|                                            | 4     | 48 (23.2%)   | 46 (22.2%)  |                        | 55 (21.5%)  | 55 (21.5%)  |                        |
|                                            | 5     | 41 (19.8%)   | 30 (14.5%)  |                        | 43 (16.8%)  | 33 (12.9%)  |                        |
| Schizophrenia                              | 1     | 36 (17.4%)   | 30 (14.5%)  | 0.2                    | 49 (19.1%)  | 34 (13.3%)  | 0.7                    |
|                                            | 2     | 15 (7.2%)    | 30 (14.5%)  |                        | 24 (9.4%)   | 35 (13.7%)  |                        |
|                                            | 3     | 40 (19.3%)   | 36 (17.4%)  |                        | 41 (16.0%)  | 45 (17.6%)  |                        |
|                                            | 4     | 43 (20.8%)   | 52 (25.1%)  |                        | 45 (17.6%)  | 53 (20.7%)  |                        |
|                                            | 5     | 73 (35.3%)   | 59 (28.5%)  |                        | 97 (37.9%)  | 89 (34.8%)  |                        |
| AIDS (Acquired Immune Deficiency Syndrome) | 1     | 35 (16.9%)   | 36 (17.4%)  | 0.4                    | 52 (20.3%)  | 36 (14.1%)  | 0.5                    |
|                                            | 2     | 18 (8.7%)    | 26 (12.6%)  |                        | 25 (9.8%)   | 35 (13.7%)  |                        |
|                                            | 3     | 41 (19.8%)   | 34 (16.4%)  |                        | 39 (15.2%)  | 42 (16.4%)  |                        |
|                                            | 4     | 37 (17.9%)   | 39 (18.8%)  |                        | 48 (18.8%)  | 56 (21.9%)  |                        |
|                                            | 5     | 76 (36.7%)   | 72 (34.8%)  |                        | 92 (35.9%)  | 87 (34.0%)  |                        |
| TB (Tuberculosis)                          | 1     | 41 (19.8%)   | 42 (20.3%)  | 0.2                    | 30 (11.7%)  | 47 (18.4%)  | <0.001                 |
|                                            | 2     | 43 (20.8%)   | 43 (20.8%)  |                        | 38 (14.8%)  | 54 (21.1%)  |                        |
|                                            | 3     | 45 (21.7%)   | 58 (28.0%)  |                        | 76 (29.7%)  | 68 (26.6%)  |                        |
|                                            | 4     | 46 (22.2%)   | 39 (18.8%)  |                        | 61 (23.8%)  | 56 (21.9%)  |                        |
|                                            | 5     | 32 (15.5%)   | 25 (12.1%)  |                        | 51 (19.9%)  | 31 (12.1%)  |                        |

\* 1 expresses the lowest and 5 highest level of anxiety. \*\* statistical significance in Wilcoxon test for paired variables

**Commented [m1]:** \* is not mentioned in the table. Please mention or delete notes for \* .
